# Supplementary material
Source: publisher figshare collection journal article supplement (https://geolsoc.figshare.com/ndownloader/files/27913727)
Supplement: Supplementary file 1 [file 27913727]

Length number	Confined track length (�m)	Angle to C axis	Average DPar(�m)
TA01-1	12.99	84.21	1.85
TA01-2	12.31	64.37	1.85
TA01-3	13.01	24.17	1.85
TA01-4	13.66	51.23	1.85
TA01-5	13.82	69.99	1.6
TA01-6	13.72	69.88	1.83
TA01-7	13.43	81.29	2.34
TA01-8	14.32	44.39	2.34
TA01-9	14.16	85.6	2.17
TA01-10	11.64	76.74	1.84
TA01-11	14.38	44.46	1.71
TA01-12	13.82	74.69	1.9
TA01-13	15.4	5.98	1.9
TA01-14	13.73	62.49	1.9
TA01-15	14.33	20.05	1.59
TA01-16	12.58	44.34	1.93
TA01-17	14.4	17.05	1.78
TA01-18	13.98	19.75	1.78
TA01-19	12.13	61.85	2.09
TA01-20	12.48	86.9	1.55
TA01-21	14.01	76.55	1.97
TA01-22	14.79	66.75	1.97
TA01-23	15.85	24.48	1.97
TA01-24	13.57	60.61	1.97
TA01-25	13.58	23.42	1.97
TA01-26	14.95	69.27	1.95
TA01-27	14.23	28.82	1.95
TA01-28	12.92	84.48	1.95
TA01-29	13.47	66.54	2.07
TA01-30	12.33	73.44	1.68
TA01-31	13.71	80.09	1.76
TA01-32	12.73	60.71	1.82
TA01-33	14.56	60.96	1.82
TA01-34	12.56	80.94	1.82
TA01-35	14.6	54.03	1.76
TA01-36	10.82	79.28	1.68
TA01-37	13.36	70.44	1.91
TA01-38	13.26	60.28	1.91
TA01-39	13.26	68.93	1.91
TA01-40	13.75	84.88	1.91
TA01-41	15.31	63.11	1.66
TA01-42	12.5	75.12	1.66
TA01-43	8.75	59.18	1.66
TA01-44	13.75	87.33	1.66
TA01-45	13.71	34.28	1.66
TA01-46	14.19	49.1	1.66
TA01-47	13.17	38.54	1.66
TA01-48	13.86	68.01	1.66
TA01-49	14.35	37.97	1.66
TA01-50	12.89	73.08	1.66
TA01-51	13.81	20.85	1.69
TA01-52	14.38	59.62	1.57
TA01-53	11.4	68.92	1.57
TA01-54	13.79	39.51	1.57
TA01-55	14.69	64.98	1.66
TA01-56	12.26	82	1.66
TA01-57	14.54	58.12	1.66
TA01-58	13.36	58.23	1.66
TA01-59	10.72	29.66	1.66
TA01-60	12.74	16.89	1.66
TA01-61	11.72	7.22	1.66
TA01-62	12.9	89.11	1.66
TA01-63	13.2	72.99	1.66
TA01-64	13.19	79.96	1.66
TA01-65	13.02	57.71	1.66
TA01-66	13.87	56.65	1.66
TA01-67	13.36	58.99	1.66
TA01-68	14.71	17.98	1.66
TA01-69	14.16	77.23	1.62
TA01-70	13.53	78.49	1.62
TA01-71	14.2	56.64	1.62
TA01-72	14.05	63.79	1.62
TA01-73	13.81	53.16	1.56
TA01-74	12.9	72.48	1.56
TA01-75	13.3	72.81	1.42
TA01-76	12.58	85.17	1.67
TA01-77	14.11	23.25	1.67
TA01-78	13.37	68.61	1.67
TA01-79	14.65	21.59	1.67
TA01-80	14.01	62.36	1.61
TA01-81	13.74	44.33	1.3
TA01-82	13.39	84.35	1.3
TA01-83	13.71	51.7	1.3
TA01-84	14.22	82.17	1.39
TA01-85	13.21	83.23	1.39
TA01-86	13.96	53.07	1.63
TA01-87	12.19	81.87	1.63
TA01-88	12.37	68.63	1.63
TA01-89	14.69	66.97	1.61
TA01-90	13.06	77.51	1.61
TA01-91	13.17	32	1.61
TA01-92	14.81	38.07	1.61
TA01-93	14.54	48.73	1.69
TA01-94	13.74	86.16	1.69
TA01-95	9.11	11.76	1.69
TA01-96	13.81	60.95	1.69
TA01-97	14.2	60.83	1.69
TA01-98	14.96	22.45	1.69
TA01-99	14.53	51.88	1.69
TA01-100	13.75	38.71	1.69
TA06-1	11.74	79.46	1.15
TA06-2	11.29	66.17	1.29
TA06-3	14.22	82.65	0.8
TA06-4	13.13	72.18	0.89
TA06-5	13.88	28.78	1.16
TA06-6	13.45	83.99	1.11
TA06-7	13.98	58.62	1.11
TA06-8	12.76	79.98	1.11
TA06-9	13.44	38.59	1.21
TA06-10	14.64	38.9	1.21
TA06-11	13.29	86.41	1.22
TA06-12	12.97	83.02	1.22
TA06-13	14.33	36.48	1.12
TA06-14	11.2	67.17	1.29
TA06-15	12.56	50.32	1.29
TA06-16	13.12	8.18	1.29
TA06-17	12.55	23.55	1.57
TA06-18	12.22	58.65	1.57
TA06-19	14.03	85.22	1.57
TA06-20	12.64	45.31	1.43
TA06-21	12.25	87.66	1.28
TA06-22	12.23	55.46	1.29
TA06-23	12.33	53.79	1.29
TA06-24	13.7	14.65	1.29
TA06-25	12.71	0.03	1.29
TA06-26	13.41	86.03	1.33
TA06-27	13.23	28.61	1.11
TA06-28	14.14	69.61	1.29
TA06-29	13.15	49.14	1.29
TA06-30	14.03	29.99	1.33
TA06-31	12.07	27.24	1.33
TA06-32	14.62	63.82	1.33
TA06-33	13.68	31.94	1.37
TA06-34	13.61	82.63	1.37
TA06-35	12.47	66.09	1.33
TA06-36	12.3	80.35	1.21
TA06-37	12.17	80.64	1.21
TA06-38	13.07	68.27	1.24
TA06-39	12.68	69.68	1.24
TA06-40	11.23	56.71	1.2
TA06-41	13.64	83.64	1.2
TA06-42	12.82	78.73	1.2
TA06-43	13.23	84.68	1.24
TA06-44	13.54	20.77	1.24
TA06-45	13.71	44.91	1.25
TA06-46	11.8	73.08	1.34
TA06-47	12.24	64.71	1.34
TA06-48	12.22	66.93	1.34
TA06-49	13.28	84.71	1.34
TA06-50	11.16	51.26	1.41
TA06-51	13.09	68.6	1.34
TA06-52	13.85	42.1	1.46
TA06-53	13.36	18.35	1.22
TA06-54	13.73	83.36	1.22
TA06-55	12.66	31.89	1.05
TA06-56	15.5	44.74	1.21
TA06-57	14.52	27.56	1.21
TA06-58	15.26	19.25	1.39
TA06-59	13.15	86.26	1.34
TA06-60	12.76	75.11	1.34
TA06-61	14.36	20.24	1.24
TA06-62	13.05	40.52	1.14
TA06-63	12.92	80.95	1.24
TA06-64	15.38	82.03	1.24
TA06-65	11.82	69.73	1.37
TA06-66	15.66	53.2	1.32
TA06-67	13.25	49.79	1.32
TA06-68	14.17	37.84	1.32
TA06-69	12.95	33.71	1.33
TA06-70	12.07	14.52	1.33
TA06-71	13.97	44.44	1.33
TA06-72	14.2	23.52	1.3
TA06-73	13.48	39.43	1.35
TA06-74	11.03	83.92	1.35
TA06-75	13.23	21.21	1.35
TA06-76	13.26	45.17	1.12
TA06-77	13.06	88.76	1.12
TA06-78	13.86	42.1	1.12
TA06-79	13.48	45.97	1.19
TA06-80	14.8	10.87	1.16
TA06-81	14.4	68.98	1.29
TA06-82	13.48	29.86	1.29
TA06-83	12.34	62.19	1.32
TA06-84	14.31	57.18	1.42
TA06-85	13.23	56.61	1.34
TA06-86	13.68	62.09	1.34
TA06-87	13.67	65.2	1.34
TA06-88	10.74	72.8	1.72
TA06-89	14.16	63.83	1.93
TA06-90	12.78	60.75	1.81
TA06-91	14.53	59.78	2.08
TA06-92	12.9	63.23	2.08
TA06-93	11.36	38.96	2.08
TA06-94	13.68	44.86	1.95
TA06-95	13.84	80.06	1.95
TA06-96	14.15	61.52	1.97
TA06-97	13.18	23.22	1.91
TA06-98	13.3	74.48	2.22
TA06-99	13.89	71.67	2.22
TA06-100	10.25	83.63	2.15
TA06-101	9.37	83.56	2.52
TA06-102	14.34	38.8	1.72
TA06-103	13.12	73.35	2.26
TA06-104	14.06	55.51	2.26
TA06-105	12.27	84.22	1.74
TA06-106	11.92	30.65	1.74
TA06-107	12.02	85.08	1.74
TA06-108	13.63	51.7	1.99
TA06-109	12.88	69.83	1.84
TA06-110	13.6	23.68	2.07
TA06-111	13.66	71.32	1.92
TA06-112	11.4	85.87	1.92
TA06-113	13.58	28.19	1.76
TA06-114	11.52	35.96	1.81
TA06-115	12.51	67.44	2
TA06-116	14.16	79.14	1.75
TA06-117	13.2	22.17	1.73
TA06-118	13.05	58.09	1.84
TA06-119	12.96	38.72	1.82
TA07-1	12.55	49.56	1.29
TA07-2	11.88	51.71	1.18
TA07-3	9.78	78.28	1.42
TA07-4	13.98	54.62	1.56
TA07-5	12.61	56.62	1.18
TA07-6	15.16	70.23	1.55
TA07-7	11.64	40.02	1.24
TA07-8	12.76	50.93	1.25
TA07-9	14.42	32.12	1.25
TA07-10	14.94	59.21	1.25
TA07-11	11.41	66.66	1.05
TA07-12	13.4	19.93	1.26
TA07-13	14.34	25.41	1.54
TA07-14	13.87	69.91	1.36
TA07-15	12.72	53.96	1.23
TA07-16	13.92	75.23	1.23
TA07-17	11.82	22.28	1.39
TA07-18	11.86	73.68	1.39
TA07-19	12.66	20.13	1.39
TA07-20	12.13	48.97	1.39
TA07-21	14.19	66.84	1.39
TA07-22	13.28	33.95	1.39
TA07-23	14.13	75.83	1.17
TA07-24	13.79	59.09	1.17
TA07-25	12.89	81.61	1.33
TA07-26	14.36	73.33	1.49
TA07-27	12.94	83.27	1.32
TA07-28	14.12	74.05	1.37
TA07-29	14.59	64.35	1.46
TA07-30	14.34	81.07	1.49
TA07-31	13.96	58.77	1.49
TA07-32	13.68	66.06	1.42
TA07-33	12.79	81.73	1.42
TA07-34	12.78	60.48	1.42
TA07-35	15.34	67.37	1.42
TA07-36	13.5	67.37	1.35
TA07-37	10.72	77.63	1.35
TA07-38	13.14	57.57	1.35
TA07-39	13.47	83.9	1.33
TA07-40	13.57	35.05	1.44
TA07-41	12.91	81.2	1.44
TA07-42	14.25	71.04	1.44
TA07-43	10.78	62.53	1.44
TA07-44	13.17	80.65	1.35
TA07-45	14.26	87.99	1.35
TA07-46	14.08	46.24	1.42
TA07-47	14.25	56.88	1.42
TA07-48	12.64	64.92	1.42
TA07-49	12.57	80.52	1.42
TA07-50	14.6	88.14	1.42
TA07-51	13.41	86.97	1.42
TA07-52	14.7	34.76	1.37
TA07-53	12.77	78.54	1.37
TA07-54	14.41	59.36	1.39
TA07-55	13.13	68.7	1.39
TA07-56	13.31	72.42	1.43
TA07-57	12.72	62.48	1.43
TA07-58	9.8	83.37	1.43
TA07-59	14.37	10.33	1.43
TA07-60	12.25	58.6	1.37
TA07-61	13.99	87.95	1.35
TA07-62	13.6	46.96	1.35
TA07-63	11.98	52.7	1.35
TA07-64	13.31	45.29	1.28
TA07-65	11.58	32.3	1.28
TA07-66	12.85	88.87	1.28
TA07-67	10.4	73.45	1.27
TA07-68	13.48	62.81	1.27
TA07-69	14.11	46.44	1.29
TA07-70	12.78	66.73	1.29
TA07-71	13.06	49.75	1.29
TA07-72	11.65	59.12	1.29
TA07-73	14.65	69.38	1.27
TA07-74	12.41	15.59	1.27
TA07-75	10.42	80.22	1.27
TA07-76	10.06	81.74	1.28
TA07-77	12.75	60.15	1.28
TA07-78	13.37	38	1.28
TA07-79	11.95	60.91	1.28
TA07-80	12.55	53.01	1.15
TA07-81	10.56	88.98	1.29
TA07-82	15.01	65.74	1.29
TA07-83	14.49	47.18	1.29
TA07-84	13.95	40.31	1.29
TA07-85	12.37	37.01	1.34
TA07-86	15.4	39.01	1.34
TA07-87	13.8	67.41	1.45
TA07-88	12.98	51.02	1.38
TA07-89	13.71	48.27	1.38
TA07-90	11.27	60.01	1.38
TA07-91	14.53	19.98	1.29
TA07-92	13.65	49.2	1.29
TA07-93	14.7	19.99	1.29
TA07-94	14.65	60.17	1.37
TA07-95	12.69	76.87	1.37
TA07-96	13.94	47.29	1.38
TA07-97	14.98	66.96	1.43
TA07-98	12.46	44.65	1.43
TA07-99	11.64	89.46	1.43
TA07-100	11.97	61.39	1.43
TA07-101	11.41	27.59	1.43
TA10-1	12.5	15.56	2.23
TA10-2	12.77	36.23	2.23
TA10-3	13.35	32.69	2.13
TA10-4	12.96	9.34	2.13
TA10-5	10.96	87.88	2.13
TA10-6	13.29	45.11	2.13
TA10-7	13.91	39.09	2.13
TA10-8	14.85	48.01	2.13
TA10-9	14.49	81.21	2.13
TA10-10	13.13	84.35	2.13
TA10-11	13.38	48.21	2.13
TA10-12	14.25	45.1	2.13
TA10-13	13.89	47.35	2.13
TA10-14	13.42	61.74	2.12
TA10-15	12.82	12.33	2.12
TA10-16	13.53	79.77	2.12
TA10-17	12.94	44.94	2.12
TA10-18	14.53	79.41	2.12
TA10-19	14.28	54.32	2.12
TA10-20	12.11	77.43	2.12
TA10-21	13.86	49.2	2.12
TA10-22	11.68	77.04	2.12
TA10-23	13.12	77.36	2.12
TA10-24	14.29	83.78	2.68
TA10-25	13.54	42.33	2.68
TA10-26	13.68	8.37	2.68
TA10-27	13.83	61.85	2.68
TA10-28	13.19	83.94	2.68
TA10-29	13.45	28.28	2.68
TA10-30	13.16	89.53	2.68
TA10-31	14.18	53.31	2.68
TA10-32	14.1	20.44	2.34
TA10-33	11.55	80.17	2.34
TA10-34	11.45	27.75	2.34
TA10-35	13.12	63.57	2.34
TA10-36	13.53	75.55	2.34
TA10-37	11.65	55.01	2.34
TA10-38	14.46	72.59	2.34
TA10-39	13.46	53.5	2.34
TA10-40	12.99	37.17	2.34
TA10-41	13.62	58.64	2.23
TA10-42	13.74	84.3	2.4
TA10-43	13.73	71.22	2.4
TA10-44	15.08	31.15	2.4
TA10-45	11.02	16.51	2.4
TA10-46	11.3	69.46	2.4
TA10-47	13.7	49.04	2.4
TA10-48	14.28	11.85	2.4
TA10-49	12.95	68.46	2.24
TA10-50	12.11	76.57	1.71
TA10-51	12.51	61.22	1.71
TA10-52	12.86	49.27	1.71
TA10-53	8.56	81.72	1.71
TA10-54	14.02	72.85	1.75
TA10-55	13.75	78.05	1.75
TA10-56	8.92	62.77	1.66
TA10-57	11.76	15.49	1.95
TA10-58	11.61	23.36	1.95
TA10-59	12.54	82.89	1.95
TA10-60	12.53	29.85	1.95
TA10-61	11.81	62.59	1.9
TA10-62	12.82	64.3	2.37
TA10-63	15.86	6.69	2.37
TA10-64	11.72	77.04	2.37
TA10-65	12.78	24.14	2.04
TA10-66	13.7	85.15	2.04
TA10-67	12.81	48.38	2.04
TA10-68	15.51	56.59	1.9
TA10-69	14.34	72.84	2.24
TA10-70	11.91	81.2	2.24
TA10-71	13.63	53.75	2.24
TA10-72	12.53	40.6	2.24
TA10-73	9.71	69.23	2.24
TA10-74	13.68	33.43	2.03
TA10-75	15.56	13.26	2.03
TA10-76	13.23	44.03	2.37
TA10-77	14.18	60.28	2.37
TA10-78	13.26	3.56	1.32
TA10-79	11.01	88.1	1.32
TA10-80	13.35	83.56	1.78
TA10-81	14.78	6.07	1.78
TA10-82	10.88	69.19	1.78
TA10-83	13.81	65.36	1.78
TA10-84	12.93	81.67	2.21
TA10-85	14.45	49.7	2.21
TA10-86	13.56	15.69	2.21
TA10-87	11.12	54.96	2.21
TA10-88	8.39	75.5	2.21
TA10-89	12.07	73.46	2.21
TA10-90	12.6	67.77	2.21
TA10-91	14.95	11.55	1.73
TA10-92	13.3	64	1.73
TA10-93	14.15	35.11	2.06
TA10-94	12.65	18.33	2.06
TA10-95	10.9	44.17	2.06
TA10-96	12.64	77.35	2.06
TA10-97	13.07	86.79	2.06
TA10-98	13.13	12.39	2.15
TA10-99	14.04	72.31	2.15
TA10-100	12.92	51.01	2.15
TA11-1	12.89	89.92	1.11
TA11-2	13.21	70.46	1.47
TA11-3	12.69	81.92	1.47
TA11-4	13.64	86.8	1.47
TA11-5	10.02	23.54	1.47
TA11-6	9.38	81.23	1.31
TA11-7	14.09	70.22	1.27
TA11-8	15.77	67.69	1.34
TA11-9	13.94	14.28	1.34
TA11-10	11	54.2	1.34
TA11-11	14.6	28.3	1.34
TA11-12	13.99	46.09	1.31
TA11-13	11.62	60.51	1.33
TA11-14	11.21	79.74	1.41
TA11-15	11.85	47.39	1.27
TA11-16	13.94	69.55	1.26
TA11-17	9.29	69.6	1.26
TA11-18	12.23	61.64	1.43
TA11-19	10.32	52.49	1.43
TA11-20	12.66	52.55	1.1
TA11-21	12.24	64.98	1.33
TA11-22	10.83	65.36	1.33
TA11-23	12.29	51.24	1.2
TA11-24	11.35	31.88	1.44
TA11-25	11.08	62.74	1.44
TA11-26	12.3	46.06	0.92
TA11-27	12.74	62.75	1.05
TA11-28	12.05	31.52	1.05
TA11-29	12.12	51.35	1.08
TA11-30	12.31	48.47	1.18
TA11-31	12.52	79.92	1.18
TA11-32	13.49	51.08	1.18
TA11-33	13.05	53.9	1.42
TA11-34	11.7	34.84	1.42
TA11-35	10.15	20.83	1.42
TA11-36	11.64	62.02	1.42
TA11-37	12.77	67.28	1.42
TA11-38	10.15	72.34	1.42
TA11-39	9.54	63.53	1.42
TA11-40	10.68	72.38	1.42
TA11-41	13.14	60.13	1.42
TA11-42	13.27	46.96	1.42
TA14-1	15.23	38.64	1.55
TA14-2	12.89	81.24	1.55
TA14-3	14.4	35.79	1.57
TA14-4	12.9	78.61	1.27
TA14-5	12.59	80.09	1.6
TA14-6	14.02	79.9	1.7
TA14-7	13.91	45.99	1.63
TA14-8	14.09	84.31	1.43
TA14-9	12.53	45.31	1.43
TA14-10	13.72	14.64	1.52
TA14-11	14.57	32.89	1.52
TA14-12	13.88	48.21	1.68
TA14-13	12.73	71.63	1.56
TA14-14	12.75	73.38	1.56
TA14-15	13.19	59.41	1.72
TA14-16	13.33	62.26	1.79
TA14-17	13.67	30.55	1.9
TA14-18	10.55	33	1.67
TA14-19	13.45	80.68	1.53
TA14-20	14.25	88.03	1.67
TA14-21	13.52	73.27	1.55
TA14-22	14.49	66.27	1.5
TA14-23	13.23	40.43	1.5
TA14-24	13.8	57.89	1.38
TA14-25	12.81	77.33	1.28
TA14-26	13.14	31.14	1.28
TA14-27	13.98	83.85	1.31
TA14-28	13.13	48.66	1.31
TA14-29	10.85	87.12	1.16
TA14-30	13.28	41.16	1.38
TA14-31	13.07	68.61	1.3
TA14-32	14.09	46.91	1.36
TA14-33	9.73	67.58	1.48
TA14-34	14.08	78.57	1.5
TA14-35	11.43	45.12	1.5
TA14-36	9.35	40.29	1.5
TA14-37	12.73	71.42	1.5
TA14-38	14.51	50.1	1.5
TA14-39	12.86	61.01	1.5
TA14-40	14.94	40.16	1.5
TA14-41	14.39	26.18	1.5
TA14-42	12.69	45.3	1.5
TA14-43	11.63	48.32	1.5
TA14-44	10.23	48.83	1.5
TA14-45	14.17	70.52	1.26
TA14-46	13.85	37.21	1.26
TA14-47	13.39	40.13	1.26
TA14-48	10.22	78.76	1.26
TA14-49	14.61	40.13	1.26
TA14-50	11.29	50.34	1.26
TA14-51	13.72	24.64	1.26
TA14-52	13.72	55.25	1.31
TA14-53	14.68	57.4	1.46
TA14-54	10.9	20.51	1.46
TA14-55	8.71	74.1	1.46
TA14-56	13.92	33.92	1.46
TA14-57	15.08	55.86	1.37
TA14-58	13.63	45.7	1.37
TA14-59	13.75	68.43	1.37
TA14-60	12.53	38.67	1.37
TA14-61	14.38	87.06	1.37
TA14-62	9.39	82.74	1.37
TA14-63	12.02	49.23	1.4
TA14-64	14.7	47.66	1.4
TA14-65	14.01	47.2	1.4
TA14-66	13.75	25.14	1.4
TA14-67	13.16	81.37	1.4
TA14-68	14.06	57.37	1.4
TA14-69	10.85	74.64	1.4
TA14-70	11.42	55.35	1.25
TA14-71	13.4	57.43	1.25
TA14-72	12.1	35.76	1.25
TA14-73	12.63	56.82	1.4
TA14-74	15.43	34.92	1.4
TA14-75	10.12	45.9	1.4
TA14-76	13.15	32.08	1.4
TA14-77	12.99	80.17	1.4
TA14-78	15.39	37.94	1.31
TA14-79	14.04	53.83	1.31
TA14-80	12.31	48.11	1.31
TA14-81	14.52	54.11	1.5
TA14-82	12.94	22.53	1.5
TA14-83	13.75	50.25	1.5
TA14-84	12.84	70.08	1.5
TA14-85	12.22	21.34	1.5
TA14-86	13.81	77.36	1.5
TA14-87	12.11	53.02	1.5
TA14-88	9.5	49.61	1.5
TA14-89	13.62	66.05	1.5
TA14-90	12.03	17.7	1.5
TA14-91	12.85	76.22	1.5
TA14-92	12.02	29.17	1.5
TA14-93	13.43	55.3	1.4
TA14-94	12.89	47.96	1.4
TA14-95	14.16	22.91	1.4
TA14-96	13.04	62.64	1.4
TA14-97	14.4	63.83	1.51
TA14-98	8.57	50.11	1.51
TA14-99	14.25	37.4	1.25
TA14-100	9.71	75.99	1.25
TA14-101	12.21	73.71	1.25
TA14-102	13.85	71.31	1.49
TA14-103	13.63	42.11	1.28
TA14-104	13.14	61.08	1.28
TA14-105	13.26	66.79	1.28
TA14-106	10.25	78.5	1.28
TA15-1	11.72	76.59	1.14
TA15-2	11.12	66.06	1.14
TA15-3	11.98	15.29	1.05
TA15-4	11.73	22.53	1.37
TA15-5	15	43.13	1.37
TA15-6	14.07	8.91	1.15
TA15-7	11.21	52.84	1.15
TA15-8	12.7	47.86	1.13
TA15-9	12.8	54.73	1.12
TA15-10	13.59	67.13	1.12
TA15-11	15.02	78.76	1.28
TA15-12	9.25	71.53	1.04
TA15-13	12.32	32.05	1.28
TA15-14	12.18	86.18	1.28
TA15-15	13.52	38.65	1.28
TA15-16	12.59	77.06	1.29
TA15-17	10.4	61.45	1.27
TA15-18	12.89	85.19	1.27
TA15-19	12.43	47.96	1.17
TA15-20	11.55	46.77	1.17
TA15-21	13.05	57.8	1.54
TA15-22	11.97	55.79	1.54
TA15-23	9.35	32.7	1.54
TA15-24	12.54	51.95	1.54
TA15-25	8.62	47.03	1.54
TA15-26	10.91	72.17	1.51
TA15-27	10.56	62.64	1.1
TA15-28	15.08	66.02	1.35
TA15-29	9.32	54.15	1.35
TA15-30	14.04	45.83	1.35
TA15-31	12.5	71.71	1.35
TA15-32	11.24	18.74	1.35
TA16-1	10.19	13.99	1.22
TA16-2	13.21	50.35	1.22
TA16-3	13.83	84.39	1.11
TA16-4	13.02	30.45	1.13
TA16-5	14.64	83.52	1.27
TA16-6	13.5	48.81	1.21
TA16-7	13.88	84.27	1.37
TA16-8	14.13	56.1	1.23
TA16-9	13.54	59.76	1.15
TA16-10	15.25	22.3	1.28
TA16-11	10.6	82.69	1.28
TA16-12	11.53	84.28	1.24
TA16-13	14.96	63.06	1.24
TA16-14	13.06	33.48	1.14
TA16-15	13.86	48.84	1.14
TA16-16	14.1	79.03	1.21
TA16-17	14.14	55.27	1.18
TA16-18	11.88	69.19	1.18
TA16-19	12.93	41.87	1.24
TA16-20	12.03	72.17	1.24
TA16-21	15.32	41.77	1.18
TA16-22	15.35	63.35	1.18
TA16-23	13.32	73.98	1.23
TA16-24	12.33	53.59	1.18
TA16-25	14.02	11.13	1.18
TA16-26	14.54	31.05	1.18
TA16-27	13.87	40.62	1.18
TA16-28	13.85	46.99	1.15
TA16-29	12.99	15.4	1.41
TA16-30	13.99	36.02	1.14
TA16-31	13.09	88.01	1.14
TA16-32	12.91	11.04	1.29
TA16-33	13.66	64.62	1.28
TA16-34	13.62	71.87	1.24
TA16-35	13.24	61.12	1.25
TA16-36	15.82	21.58	1.34
TA16-37	11.78	68.22	1.24
TA16-38	12.4	59.96	1.22
TA16-39	11.21	53.25	1.22
TA16-40	12.83	30.28	1.13
TA16-41	11.16	78.15	1.2
TA16-42	9.93	31.55	1.35
TA16-43	14.67	54	1.01
TA16-44	12.31	54.93	0.87
TA16-45	14.77	42.99	0.87
TA16-46	9.83	82.05	1.31
TA16-47	14.3	61.92	1.29
TA16-48	13.39	40.47	1.22
TA16-49	13.74	83.67	1.2
TA16-50	14.65	65.6	1.56
TA16-51	13.14	44.29	1.56
TA16-52	12.32	53.69	1.56
TA16-53	12.92	85.79	1.3
TA16-54	14.79	44.87	1.34
TA16-55	13.65	84.79	1.2
TA16-56	11.36	22.62	1.24
TA16-57	15.55	69.95	1.16
TA16-58	13.38	62.56	1.14
TA16-59	13.98	30.19	0.96
TA16-60	14.91	64.93	0.85
TA16-61	13.58	62.91	1.17
TA16-62	13.39	38.26	1.08
TA16-63	9.63	43.44	1.08
TA16-64	12.71	72.62	1.26
TA16-65	11.55	48.99	0.83
TA17-1	11.12	41.58	1.15
TA17-2	13.56	76.02	1.15
TA17-3	14.06	31.23	1.15
TA17-4	9.83	21.75	1.15
TA17-5	11.78	40.89	1.15
TA17-6	13.97	70.99	1.15
TA17-7	12.82	41.81	1.15
TA17-8	11.03	23.28	0.98
TA17-9	12.08	65.09	0.98
TA17-10	12.79	51.75	1.3
TA17-11	13.16	55.28	1.15
TA17-12	8.08	72.23	1.09
TA17-13	13.92	52.83	1.33
TA17-14	13.62	69.3	0.94
TA17-15	13.5	62.65	1.07
TA17-16	12.27	55.24	1.12
TA17-17	8.96	59.38	1.13
TA17-18	14.03	63.3	1.04
TA17-19	12.14	69.93	1.11
TA17-20	12.51	29.11	1.11
TA17-21	13.65	79.92	1.12
TA17-22	14.19	54.83	1.12
TA17-23	13.49	82.82	1.25
TA17-24	12.25	75.53	1.25
TA17-25	11.29	41.51	1.09
TA17-26	11.42	89.35	1.09
TA17-27	10.02	78.07	1.09
TA17-28	9.45	11.06	1.09
TA17-29	10.63	48.24	1.09
TA17-30	11.97	71.34	1.09
TA17-31	12.44	71.24	1.29
TA17-32	12.03	69.5	1.29
TA17-33	10.52	58.47	1.27
TA17-34	12.96	43.12	1.27
TA17-35	12.87	72.66	1.27
TA17-36	14.53	37.66	1.27
TA17-37	13.66	72.66	1.27
TA17-38	13.77	65.1	1.27
TA17-39	8.1	60.1	1.27
TA17-40	14.21	49.36	1.46
TA17-41	13.09	71.74	1.46
TA17-42	10.95	82.51	1.46
TA17-43	13.72	55.05	1.46
TA17-44	14.65	82.02	1.46
TA17-45	14.53	44.89	1.46
TA17-46	10.18	28.38	1.46
TA17-47	14.16	79.88	1.46
TA17-48	14.23	58.89	1.46
TA17-49	14.04	73.54	1.46
TA17-50	14.12	81.75	1.46
TA17-51	11.97	81.51	1.46
TA17-52	14.48	89.12	1.46
TA17-53	11.85	36.03	1.46
TA17-54	9.52	64.52	1.46
TA17-55	12.24	58.11	1.46
TA17-56	13.33	67.98	1.46
TA17-57	8.6	89.37	1.46
TA17-58	14.06	49.48	1.47
TA17-59	11.72	74.85	1.47
TA17-60	14.5	62.58	1.57
TA17-61	13.72	68.82	1.57
TA17-62	13.44	75.97	1.57
TA17-63	12.92	57.1	1.57
TA17-64	13.7	53.04	1.57
TA17-65	11.25	21.11	1.57
TA17-66	13.11	62.22	1.57
TA17-67	10.17	58.64	1.57
TA17-68	14.27	80.64	1.57
TA17-69	7.89	79.83	1.57
TA17-70	14.32	50.04	1.42
TA17-71	10.16	19.41	1.42
TA17-72	14.25	47.91	1.44
TA17-73	11.69	58.02	1.44
TA17-74	11.21	7.72	1.44
TA17-75	9.96	36.11	1.44
TA17-76	12.78	48.74	1.44
TA17-77	13.6	43.98	1.44
TA17-78	13.31	64.52	1.44
TA17-79	13.39	27.59	1.44
TA17-80	14.03	61.55	1.44
TA17-81	14.52	63.92	1.44
TA17-82	9.13	78.17	1.44
TA17-83	12.02	73.5	0.94
TA17-84	11.4	51.05	0.94
TA17-85	13.35	56.35	0.94
TA17-86	14.37	47.88	0.94
TA17-87	11.24	77.38	1.21
TA17-88	9.6	45.21	1.21
TA17-89	8.89	66.02	1.21
TA17-90	11.91	42.65	1.21
TA17-91	13.67	45.64	1.24
TA17-92	11.09	64.24	1.24
TA17-93	11.91	68.02	1.23
TA17-94	12.82	47.12	1.23
TA17-95	15.14	52.16	1.23
TA17-96	13.09	37.97	1.23
TA17-97	15.09	73.7	1.23
TA17-98	10.07	34.79	1.23
TA17-99	7.84	41.56	1.23
TA17-100	12.56	60.27	1.23
TA17-101	13.05	64.57	1.23
TA17-102	9.42	16.2	1.23
TA17-103	14.66	37.88	1.23
TA17-104	10.84	25.67	1.23
TA17-105	9.1	88.78	1.23
TA17-106	9.42	61.45	1.23
TA17-107	13.45	48.79	1.23
TA17-108	9.95	52.14	1.23
TA17-109	14.85	78.86	1.23
TA17-110	8.9	52.46	1.23
TA17-111	12.78	75.66	1.47
TA17-112	13.85	82.2	1.41
TA17-113	10.07	60.38	1.32
TA17-114	13.65	38.75	1.32
TA17-115	13.99	79.71	1.4
TA17-116	15.08	82.18	1.4
TA18-1	10.31	34.3	1.57
TA18-2	12.16	12.03	1.57
TA18-3	12.37	44.55	1.57
TA18-4	13.02	70.83	1.43
TA18-5	12.96	84.24	1.5
TA18-6	15.31	23.34	1.49
TA18-7	14.96	85.12	1.72
TA18-8	15.7	46.05	1.69
TA18-9	11.18	81.07	1.43
TA18-10	12.69	58.6	1.73
TA18-11	13.44	36.44	1.73
TA18-12	10.98	59.21	1.73
TA18-13	12.65	87.01	1.73
TA18-14	15.13	48.27	1.73
TA18-15	13.33	75.6	1.73
TA18-16	12.12	45.24	1.65
TA18-17	14.44	66.98	1.65
TA18-18	12.2	74.91	1.65
TA18-19	11.34	80.14	1.65
TA18-20	13.02	53.71	1.65
TA18-21	11	74.96	1.65
TA18-22	13.18	30.86	1.65
TA18-23	14.38	65.69	1.65
TA18-24	11.88	58.69	1.65
TA18-25	14.43	80.21	1.65
TA18-26	12.07	51.7	1.65
TA18-27	14.16	0	1.65
TA18-28	11.76	31.51	1.48
TA18-29	13.04	61.48	1.37
TA18-30	11.25	40.73	1.63
TA18-31	11.45	51.82	1.63
TA18-32	10.66	71.86	1.63
TA18-33	14.16	42.8	1.63
TA18-34	11.8	5.38	1.67
TA18-35	11.5	23.66	1.67
TA18-36	13.99	34.87	1.57
TA18-37	13.7	59	1.55
TA18-38	12.68	69.12	1.55
TA18-39	12.63	65.6	1.55
TA18-40	12.79	55.6	1.55
TA18-41	12.25	47.55	1.55
TA18-42	12.95	62.75	1.4
TA18-43	9.89	70.86	1.4
TA18-44	13	18.7	1.4
TA18-45	13.21	52.37	1.4
TA18-46	11.34	59	1.4
TA18-47	11.75	21.79	1.67
TA18-48	10.72	66.48	1.67
TA18-49	13.79	39.52	1.43
TA18-50	11.74	60.52	1.5
TA18-51	13.6	81.87	1.68
TA18-52	13.53	51.8	1.41
TA18-53	13.83	79.73	1.68
TA18-54	10.56	81.97	1.68
TA19-1	12.87	41.41	1.14
TA19-2	13.46	64.54	1.47
TA19-3	13.71	71.03	1.47
TA19-4	13.55	59.28	1.47
TA19-5	12.2	69.41	1.47
TA19-6	11.86	77.79	1.47
TA19-7	9.44	71.48	1.47
TA19-8	13.87	71.28	1.47
TA19-9	12.67	52.72	1.47
TA19-10	8.79	65.3	1.47
TA19-11	12.45	80.56	1.47
TA19-12	14.56	66.83	1.47
TA19-13	12.58	77.91	1.47
TA19-14	13.66	86.83	1.41
TA19-15	14.13	89.87	1.41
TA19-16	15.02	19.44	1.41
TA19-17	10.43	81.72	1.41
TA19-18	10.78	51.48	1.41
TA19-19	15.02	38.46	1.41
TA19-20	12.23	65.62	1.41
TA19-21	12.32	75.24	1.41
TA19-22	13.09	66.17	1.41
TA19-23	14.24	45.69	1.41
TA19-24	13.58	65.57	1.41
TA19-25	11.75	53.43	1.41
TA19-26	10.09	75.58	1.41
TA19-27	13.82	37.95	1.41
TA19-28	10.98	85.93	1.41
TA19-29	12.96	66.36	1.41
TA19-30	11.66	58.58	1.41
TA19-31	12.23	35.42	1.41
TA19-32	13.54	58.9	1.28
TA19-33	13.79	30.75	1.28
TA19-34	12.95	76.22	1.11
TA19-35	12.08	64.22	1.11
TA19-36	12.82	45.5	1.46
TA19-37	14.39	74.62	1.46
TA19-38	13.31	74.8	1.46
TA19-39	14.25	29.42	1.46
TA19-40	12.16	58.98	1.46
TA19-41	11.62	70.28	1.46
TA19-42	13.06	83.71	1.46
TA19-43	13.77	33.91	1.46
TA19-44	13.37	47.58	1.46
TA19-45	8.03	82.22	1.46
TA19-46	10.76	84.97	1.46
TA19-47	12.31	84.5	1.46
TA19-48	15.44	61.02	0.87
TA19-49	10.39	54.93	0.87
TA19-50	12.51	55.77	0.87
TA19-51	10.1	76.55	1.08
TA19-52	11.5	19.71	1.08
TA19-53	11.4	38.22	1.08
TA19-54	10.66	46.13	1.08
TA19-55	13.41	71.51	1.08
TA19-56	14.99	57.17	1.08
TA19-57	14.05	34.33	1.08
TA19-58	12.06	19.42	1.08
TA19-59	14.45	36.41	1.17
TA19-60	10.4	83.86	1.17
TA19-61	10.93	37.94	1.17
TA19-62	12.27	71.13	1.17
TA19-63	10.42	85.28	1.17
TA19-64	12.96	72.24	1.17
TA19-65	11.53	39.39	1.02
TA19-66	11.11	49.51	1.02
TA19-67	10.59	75.31	1.2
TA19-68	11.88	48.02	1.2
TA19-69	12.06	64.28	1.49
TA19-70	13.19	87.4	1.16
TA19-71	13.38	43.63	1.16
TA19-72	12.78	64.68	1.16
TA19-73	12.79	81.2	1.16
TA19-74	14.16	70.57	1.29
TA19-75	14.76	40.31	1.34
TA19-76	14.08	85.34	1.34
TA19-77	14.94	64.37	0.98
TA19-78	8.83	49.6	0.98
TA19-79	14.85	76.47	1.12
TA19-80	12.08	35.92	1.12
TA19-81	14.62	35.27	1.12
TA19-82	13.76	83.56	1.12
TA19-83	12.7	68.98	1.12
TA19-84	10.17	66.35	1.12
TA19-85	9.88	48.95	1.34
TA19-86	9.92	77.51	1.34
TA19-87	10.62	75.3	1.34
TA19-88	13.72	39.56	1.34
TA19-89	12.37	40.75	1.34
TA19-90	10.54	42.16	1.07
TA19-91	14.39	65.23	1.34
TA19-92	12.21	70.74	1.31
TA19-93	11.5	37.86	1.31
TA19-94	14.49	52.77	1.31
TA19-95	13.23	35.64	1.31
TA19-96	9.85	55.28	1.31
TA19-97	12.24	59.32	1.31
TA19-98	13.74	48.53	1.31
TA20-1	14.17	49.43	1.49
TA20-2	14.28	14.51	1.5
TA20-3	13.4	82.78	1.49
TA20-4	14.46	42.92	1.49
TA20-5	13.93	36.03	1.46
TA20-6	13.5	67.54	1.46
TA20-7	13.86	37.76	1.55
TA20-8	14.48	63.21	1.55
TA20-9	15.24	82.47	1.55
TA20-10	13.52	38.36	1.55
TA20-11	13.17	45.37	1.58
TA20-12	14.01	26.65	1.47
TA20-13	12.31	83.93	1.62
TA20-14	13.69	61.14	1.5
TA20-15	13.19	18.52	1.5
TA20-16	12.34	89.95	1.5
TA20-17	14.2	83.86	1.5
TA20-18	10.38	71.59	1.5
TA20-19	13.88	19.55	1.59
TA20-20	14.19	52.15	1.59
TA20-21	13.36	70.8	1.59
TA20-22	15.03	27.85	1.59
TA20-23	13.43	69.4	1.59
TA20-24	12.37	54.03	1.59
TA20-25	11.26	63.9	1.59
TA20-26	12.83	64.89	1.59
TA20-27	13.68	52.36	1.59
TA20-28	15.44	73.69	1.56
TA20-29	15.24	47.85	1.39
TA20-30	11.73	89.74	1.6
TA20-31	14.17	82.85	1.24
TA20-32	12.62	50.61	1.51
TA20-33	15.14	60.43	1.3
TA20-34	13.94	35.63	1.27
TA20-35	13.41	83.06	1.61
TA20-36	12.91	45.96	1.28
TA20-37	13.4	68.79	1.24
TA20-38	11.9	73.19	1.24
TA20-39	13.69	59.07	1.53
TA20-40	14.03	13.53	1.53
TA20-41	14.76	34.34	1.56
TA20-42	12.86	64.15	1.55
TA20-43	14.2	58.92	1.55
TA20-44	11.68	84.18	1.44
TA20-45	15.11	42.83	1.44
TA22-1	11.82	77.42	1.84
TA22-2	14.12	43.87	1.84
TA22-3	13.14	56.95	1.84
TA22-4	15.19	89.68	1.92
TA22-5	14.74	38.34	2.1
TA22-6	13.55	75.45	1.95
TA22-7	14.29	89.88	1.81
TA22-8	14.42	13.77	1.81
TA22-9	13.61	73.71	1.81
TA22-10	14.09	62.67	1.81
TA22-11	15.31	58.75	1.73
TA22-12	14.29	13.08	1.73
TA22-13	13.96	42.19	1.7
TA22-14	13.19	67.78	1.86
TA22-15	14.7	57.51	2.09
TA22-16	12.66	60.61	2.09
TA22-17	12.47	84.25	2.09
TA22-18	12.94	16.44	2.09
TA22-19	13.06	34.2	2.09
TA22-20	14.98	45.16	2.09
TA22-21	13.74	83.06	1.71
TA22-22	12.6	37.16	1.71
TA22-23	14.36	77.91	1.85
TA22-24	14.37	60.54	1.72
TA22-25	12.73	85.04	2.07
TA22-26	14.38	49.75	2
TA22-27	13.23	52.08	2.35
TA22-28	13.46	65.74	2.12
TA22-29	14.7	13.75	2.23
TA22-30	14.05	22.66	2.1
TA22-31	13.86	84.31	2.58
TA22-32	14.67	48.78	2.41
TA22-33	13.66	66.09	2.25
TA22-34	14.91	78.51	2.25
TA22-35	12.44	59.9	2.5
TA22-36	15.26	63.37	2.5
TA22-37	13.3	21.69	2.5
TA22-38	13.53	80.49	2.5
TA22-39	13.09	87.7	2.08
TA22-40	13.93	41.32	2.08
TA22-41	14.19	66.25	1.97
TA22-42	13.34	34.5	1.67
TA22-43	13.08	43.01	1.79
TA22-44	15.05	38.41	1.92
TA22-45	14.4	58.9	2.12
TA22-46	14.28	45.57	1.55
TA22-47	14.39	50.11	1.95
TA22-48	13.69	31.8	1.63
TA22-49	13.22	36.56	1.63
TA22-50	15	34.46	1.64
TA22-51	13.56	7.33	2.01
TA22-52	13.71	77.03	1.72
TA22-53	16.24	75.37	1.89
TA22-54	13.34	67.4	1.89
TA22-55	13.58	85.08	1.89
TA22-56	15.67	18.13	1.85
TA22-57	14.81	83.11	1.85
TA22-58	12.55	53.03	1.87
TA22-59	13.38	36.53	1.64
TA22-60	13.36	49.74	1.65
TA22-61	14.11	74.58	1.71
TA22-62	13.71	24.2	1.72
TA22-63	14.72	49.51	1.66
TA22-64	12.99	51.27	1.48
TA22-65	14.79	81.52	1.64
TA22-66	14.01	70.23	1.61
TA22-67	13.45	77.7	1.89
TA22-68	14.12	76.25	1.89
TA22-69	12.59	68.4	1.89
TA22-70	11.78	27.32	1.89
TA22-71	13.22	65.61	1.89
TA23-1	12.23	76.08	1.58
TA23-2	14.75	79.8	1.58
TA23-3	14.38	50.6	1.58
TA23-4	12.9	41.02	1.91
TA23-5	14.36	70.29	1.91
TA23-6	12.77	67.83	1.91
TA23-7	15.18	82.4	1.46
TA23-8	11.98	76.74	1.46
TA23-9	12.29	24.26	1.46
TA23-10	13.59	38.28	1.38
TA23-11	10.98	89.78	1.38
TA23-12	12.04	40.89	1.38
TA23-13	10.58	5.55	1.38
TA23-14	13.5	83.57	1.49
TA23-15	15.03	75.11	1.54
TA23-16	13.61	59.64	1.54
TA23-17	13.34	61.29	1.54
TA23-18	14.22	66.27	1.54
TA23-19	11.92	65.63	1.39
TA23-20	11.03	85.06	1.58
TA23-21	12.98	56.12	1.58
TA23-22	16.12	41.89	1.73
TA23-23	14.02	69.69	1.73
TA23-24	14.88	9.85	1.73
TA23-25	11.57	86.74	1.73
TA23-26	13.32	47.77	1.19
TA23-27	14.05	78.79	1.19
TA23-28	15.11	45.87	1.19
TA23-29	12	46.91	1.19
TA23-30	11.92	54.81	1.19
TA23-31	14.03	47.71	1.19
TA23-32	11.74	88.24	1.16
TA23-33	12.31	72.36	1.16
TA23-34	12.32	69.72	1.77
TA23-35	12.48	80.39	1.51
TA23-36	12.94	35.39	1.51
TA23-37	14.95	35.58	1.51
TA23-38	14.33	81.6	1.51
TA23-39	13.58	86.5	1.53
TA23-40	13.64	82.38	1.53
TA23-41	14.41	16.72	1.53
TA23-42	12.19	79.29	1.53
TA23-43	13.51	44.93	1.53
TA23-44	14.47	65.77	1.53
TA23-45	12.06	53.28	1.53
TA23-46	11.42	64.2	1.53
TA23-47	13.49	60.8	1.4
TA23-48	13.46	82.64	1.56
TA23-49	13.31	53.77	1.56
TA23-50	12.48	66.22	1.56
TA23-51	12.51	78.62	1.56
TA23-52	14	57.85	1.56
TA23-53	12.42	55.13	1.56
TA23-54	12.13	61.32	1.56
TA23-55	13.92	32.09	1.56
TA23-56	14.19	80.55	1.56
TA23-57	12.83	73.95	1.56
TA23-58	13.5	63.92	1.66
TA23-59	13.72	73.06	1.38
TA23-60	11.5	72.65	1.46
TA23-61	12.56	67.8	1.46
TA23-62	12.7	69.83	1.46
TA23-63	14.78	13.8	1.41
TA23-64	10.09	81.82	1.41
TA23-65	13.07	83.68	1.41
TA23-66	13.19	56.82	1.41
TA23-67	13.74	54.07	1.41
TA23-68	14.57	60.97	1.41
TA23-69	12.83	37.63	1.41
TA23-70	13.12	78.81	1.41
TA23-71	13.93	77.36	1.41
TA23-72	14.7	64.57	1.5
TA23-73	14.43	47.25	1.5
TA23-74	14.83	63.35	1.5
TA23-75	14.23	70.13	1.67
TA23-76	13.09	75.64	1.62
TA23-77	14.08	26.38	1.62
TA23-78	13.24	80.14	1.62
TA23-79	12.38	64.72	1.41
TA23-80	13.29	45.78	1.41
TA23-81	14.36	30.87	1.41
TA23-82	11.08	85.38	1.41
TA23-83	12.42	81.68	1.47
TA23-84	14.98	32.84	1.47
TA23-85	13.43	69.53	1.47
TA23-86	13.63	85.09	1.82
TA23-87	13.66	58.35	1.9
TA23-88	14.2	44.67	1.9
TA23-89	13.17	75.02	1.9
TA23-90	14.79	63.46	1.9
TA23-91	13.7	73.26	1.9
TA26-1	10.71	79.54	1.63
TA26-2	13.71	70.24	2.07
TA26-3	13.55	74.19	1.76
TA26-4	12.13	78.92	1.6
TA26-5	14.65	33.89	1.94
TA26-6	13.16	55.34	1.62
TA26-7	12.29	62.66	1.54
TA26-8	12.69	81.42	1.54
TA26-9	11.73	53.39	1.54
TA26-10	14.31	54.25	1.54
TA26-11	12.5	77.67	1.54
TA26-12	13.74	59.31	1.54
TA26-13	11.86	82.97	1.54
TA26-14	13.63	70.73	1.61
TA26-15	12.53	79.8	1.61
TA26-16	14.55	61.28	1.61
TA26-17	14.42	42.46	1.61
TA26-18	14.21	69.93	1.61
TA26-19	11.92	77.12	1.63
TA26-20	15.53	47.3	1.58
TA26-21	14.49	49.36	1.55
TA26-22	13.9	33.9	1.55
TA26-23	14.27	32.35	1.82
TA26-24	14.53	35.89	1.82
TA26-25	11.71	56.28	1.79
TA26-26	13.78	60.07	1.79
TA26-27	12.65	70.01	2.14
TA26-28	11.09	38.52	2.65
TA26-29	14.12	27.14	2.19
TA26-30	14.01	2.04	2.18
TA26-31	14.03	55	2.18
TA26-32	11.6	51.97	3.01
TA26-33	10.78	38.59	3.01
TA26-34	13.92	78.18	2.08
TA26-35	13.83	44.23	2.08
TA26-36	13.02	39.42	2.08
TA26-37	13.69	66.03	1.91
TA26-38	13.96	50.27	1.91
TA26-39	14.1	67.42	1.91
TA26-40	13.81	40.44	1.91
TA26-41	14.04	56.85	1.91
TA26-42	14.13	80.38	1.61
TA26-43	14.12	23.62	1.88
TA26-44	14.67	53.41	1.88
TA26-45	15.08	63.64	1.88
TA26-46	12.9	51.98	1.55
TA26-47	13.04	49.82	1.55
TA26-48	12.04	67.15	1.67
TA26-49	11.05	68.92	1.49
TA26-50	14.75	19.63	1.49
TA26-51	9.97	85.69	1.49
TA26-52	14.46	43.36	1.33
TA26-53	13.97	75.79	1.71
TA26-54	13.15	53.37	1.71
TA26-55	13.92	30.44	1.71
TA26-56	12.05	62.63	1.71
TA26-57	13.64	55.53	2.27
TA26-58	13.68	38.54	2.27
TA26-59	14.64	16.73	1.26
TA26-60	14.1	72.92	1.26
TA26-61	10.57	77.54	1.26
TA26-62	15	44.41	1.29
TA26-63	13.35	78.07	1.11
TA26-64	12.94	14.23	1.11
TA26-65	10.62	68.16	1.11
TA26-66	12.76	46.37	1.11
TA26-67	14.17	44.23	1.11
TA26-68	11.76	76.33	1.11
TA26-69	14.3	69.97	1.3
TA26-70	13.53	73.8	1.3
TA26-71	13.13	61.59	1.3
TA26-72	15.11	25.31	1.3
TA26-73	13.79	68.36	1.3
TA26-74	14.54	82.53	1.3
TA26-75	13.95	36.67	1.3
TA26-76	11.67	73.42	1.3
TA26-77	12.5	50.69	1.3
TA26-78	14	73.8	1.3
TA26-79	12.57	69.86	1.3
TA26-80	12.96	34.79	1.3
TA26-81	12.73	41.2	1.3
TA26-82	12.52	56.48	1.3
TA26-83	14.33	35.65	1.3
TA26-84	13.52	75.52	1.3
TA26-85	12.78	34.13	1.3
TA26-86	9.65	77.48	1.3
TA26-87	12.14	76.21	1.3
TA26-88	13.78	28.79	1.3
TA26-89	12.13	66.12	1.24
TA26-90	12.99	43.59	1.24
TA26-91	12.2	52.17	1.24
TA26-92	13.5	69.16	1.24
TA26-93	12.46	79.47	1.23
TA26-94	13.36	80.83	1.23
TA26-95	10.42	83.48	1.23
TA26-96	14.07	41.22	1.39
TA26-97	12.95	77.42	1.39
TA26-98	13.28	52.42	1.39
TA26-99	12.82	83.1	1.39
TA26-100	13.25	33.75	1.39
TA26-101	11.61	71.21	1.39
TA26-102	13.1	69.84	1.39
